# Supplementary material for: High-resolution HLA phased haplotype frequencies to predict the success of unrelated donor searches and clinical outcome following hematopoietic stem cell transplantation
Source: PubMed Central journal article supplement (PMC7198472; doi:10.1038/s41409-019-0520-6), 2019-04-05
Supplement: 41409_2019_520_MOESM7_ESM.pdf [file 41409_2019_520_MOESM7_ESM.pdf]

Haplotype phasing at  
HLA-A, B and DRB1  
by segregation analysis

843 patients

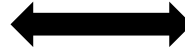

2,132 family members  
(parents, siblings or children)

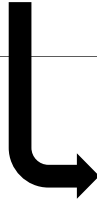

291 unrelated patients  
Among them  
140 transplanted with  
unrelated donors

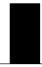

Haplotype frequency  
estimations by EM  
algorithm at HLA-A, B, C,  
DRB1 and DQB1  
and ranking

6,114 unrelated volunteer donors  
from the Swiss Registry

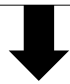

## Data analyses

- 1 - haplotype statistics
- 2 - unrelated search outcome
- 3 - clinical outcome (with additional patients)
