# Supplementary material for: High-resolution HLA phased haplotype frequencies to predict the success of unrelated donor searches and clinical outcome following hematopoietic stem cell transplantation
Source: PubMed Central journal article supplement (PMC7198472; doi:10.1038/s41409-019-0520-6), 2019-04-05
Supplement: 41409_2019_520_MOESM8_ESM.pdf [file 41409_2019_520_MOESM8_ESM.pdf]

Number of carriers at the genotypic level

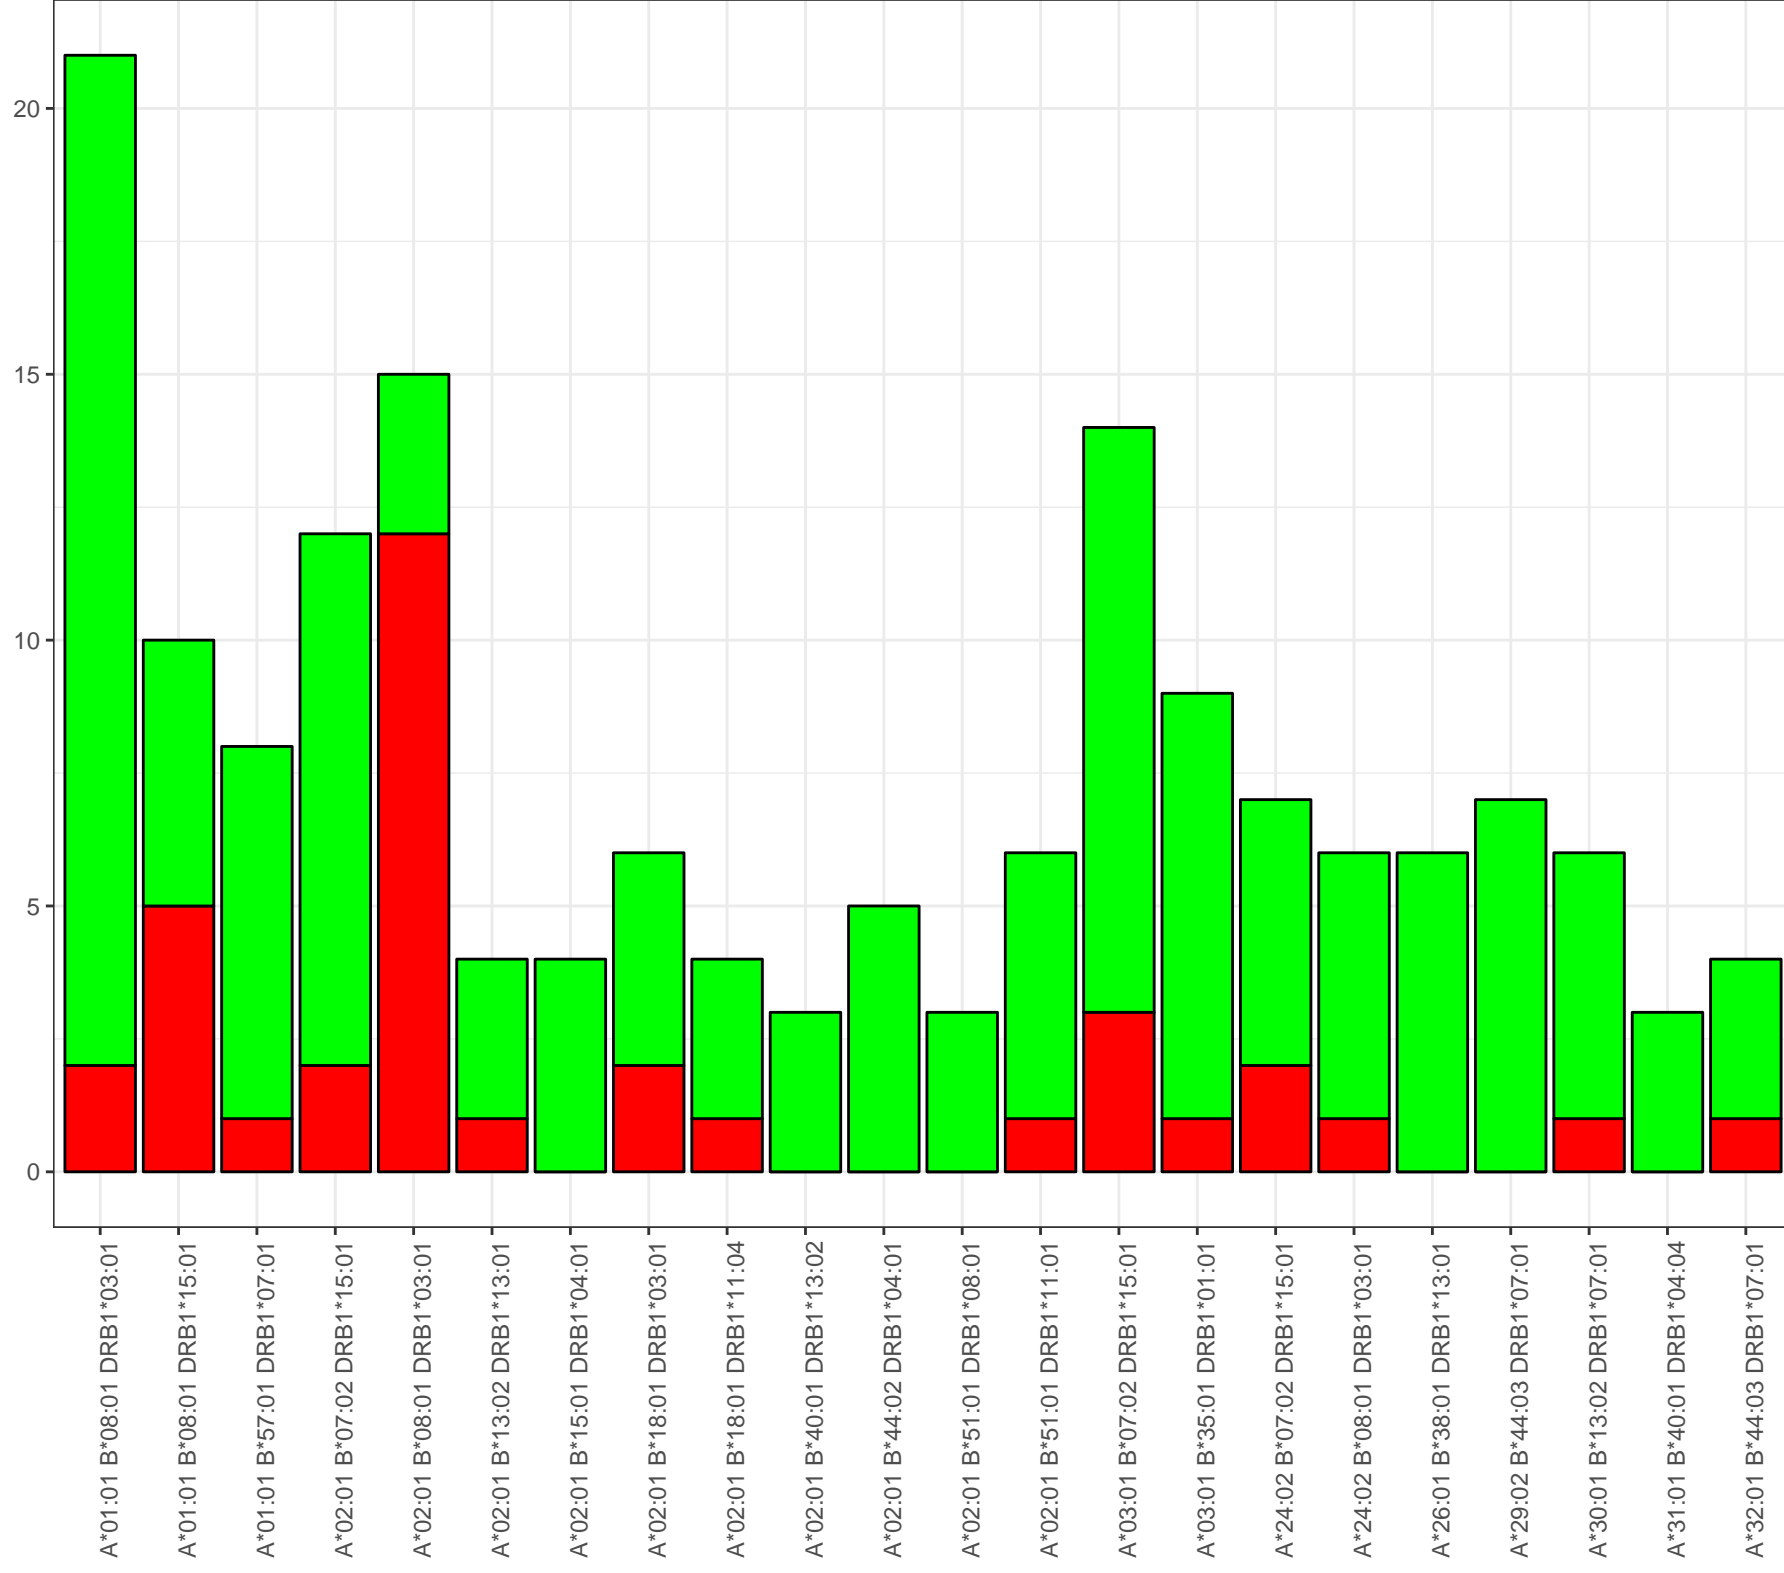

linked on chromosome  
not linked on chromosome
