# Supplementary material for: High-resolution HLA phased haplotype frequencies to predict the success of unrelated donor searches and clinical outcome following hematopoietic stem cell transplantation
Source: PubMed Central journal article supplement (PMC7198472; doi:10.1038/s41409-019-0520-6), 2019-04-05

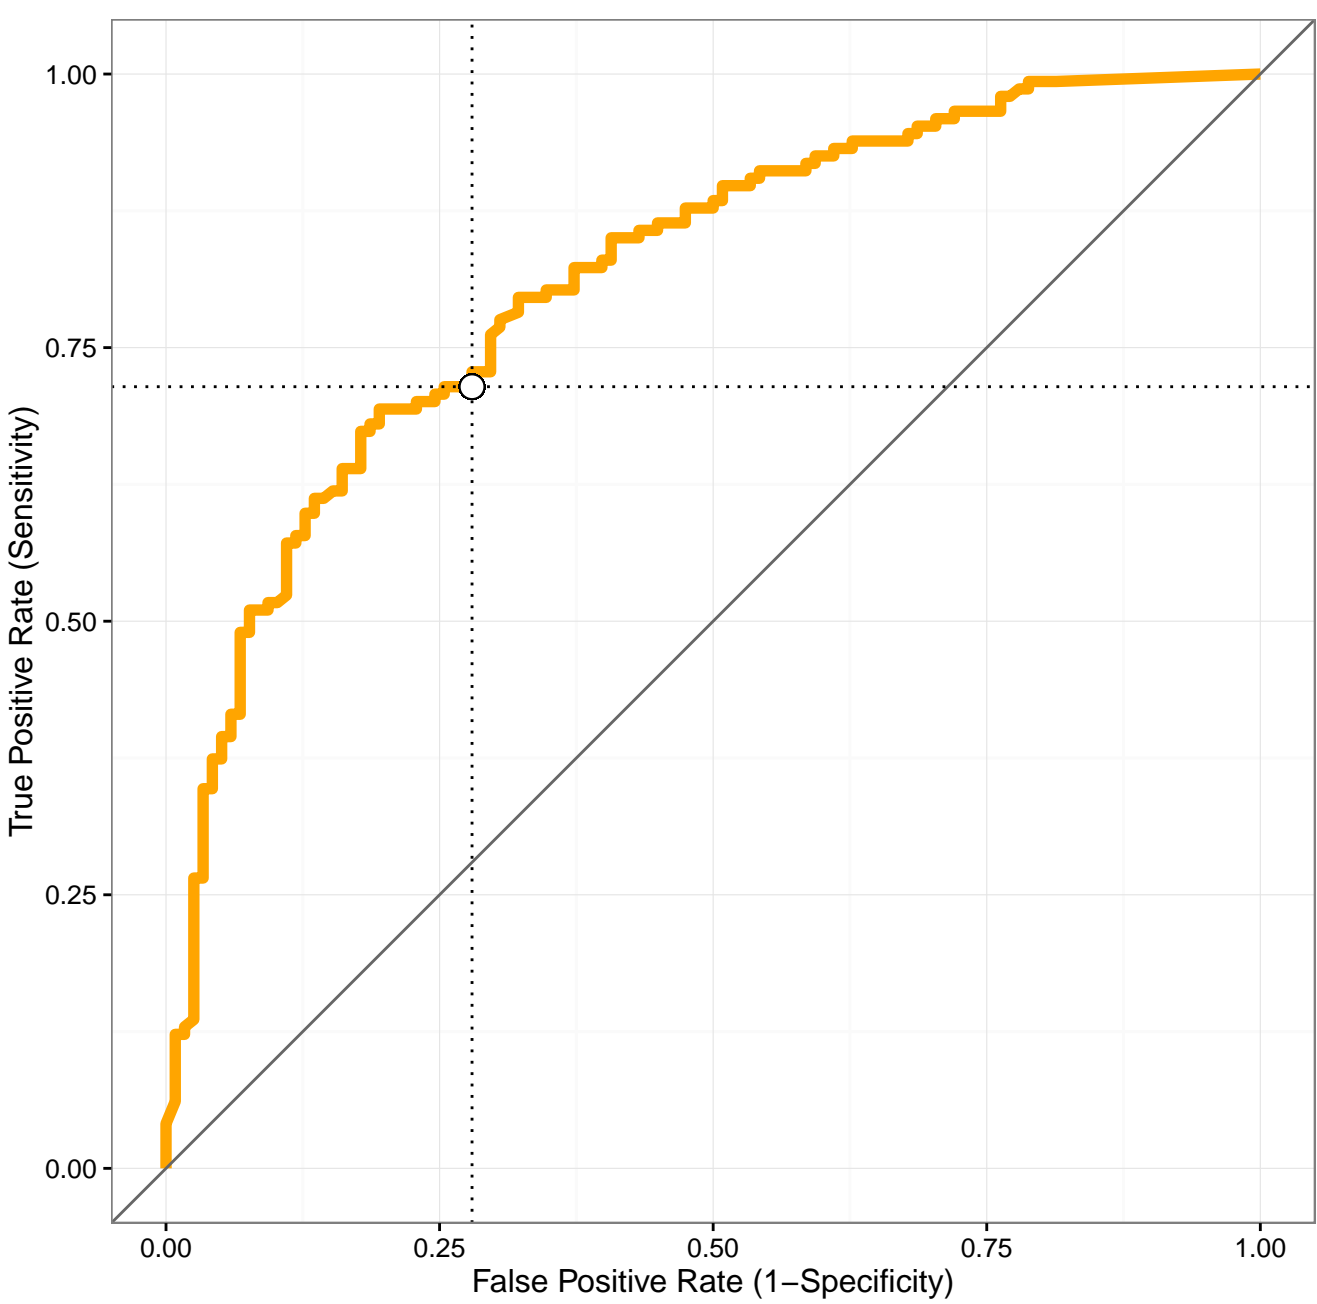

Supplement: 41409_2019_520_MOESM9_ESM.pdf [file 41409_2019_520_MOESM9_ESM.pdf]
